# Supplementary material for: Real-Time On-Site Diagnosis of Quarantine Pathogens in Plant Tissues by Nanopore-Based Sequencing
Source: MDPI journal article supplement (doi:10.3390/pathogens11020199), 2022-02-02
Supplement: s1 [file s1]

## Supplementary File S1. HL DNA barcode sequences of XF subspecies

```
XFF      TGAGCAAGGCAATAAACCGCGCACTATGTCGGACAAATTCTGTGAGGGGGAATCAAATGAC
XFM      ---CAAGGCAATAAACCGCGCACTATGTCGGACAAATTCTGTGAGGGGGAATCAAATGAC
XFP      TGAGCAAGGCAATAAACCGCGCACTATGTCGGACAAATTCTGTGAGGGGGAATCAAATGAC
          *****

XFF      TGCCTTATCTGTGAAACATGCTGCCGATCCAATACGCGGCTTGCAAACACTGACCGTGGA
XFM      TGCCTTATCTGTGAAACATGCTACCGATCCAATACGCGGCTTGCAAACACTGACCGTGGA
XFP      TGCCTTATCTGTGAAATATACTGCCGATCTAATACGCGGCTTGCAAACACTGACCGTGGA
          ***** ** * *****

XFF      AGATATTTCGAGCAATCTAACCAAGGTGTATAGCCGTATCGTTGCTGCCTGCCAAAGTGT
XFM      AGATATTTCGAGCAATCTAACCAAGGTGTATAGCCGTATCATTGCTGCCTGCCAACGTGT
XFP      AGATATTTCGAGCAATCTAACCAAGGTGTATAGCCGTATCATTGCTGCCTGCCAACGTGT
          *****

XFF      TGACCGCATCCCAGCAGCGTGACGCTGTTGCCAGTCAGCAAAACCGCGGATGAAGTGCA
XFM      TACCGCGATCCCAGCAGCGTGACGCTGTTGCCAGTCAGCAAAACCGTGGATGAAGTGCA
XFP      TGACCGCATCCCAGCAGCGTGACGCTGTTGCCAGTCAGCAAAACCGTGGATGAAGTGCA
          * *****

XFF      TATCCGATTATCCTACGAAGCCGGATGCAGGAAGCTCGGAGAGAACAAGCTCAGGATGC
XFM      TATCCGATTATCCTACGAAGCCGGATGCAGGAAGCTGGGGGAGAACAAAGCGCAGGATGC
XFP      TATCCGATTATCCTACGAAGCCGGATGCAGGAAGCTGGGGGAGAACAAAGCGCAGGATGC
          ***** * *****

XFF      TTACCACAAGTGGGAAGCGATGAGCGATCTCACTGATCTGTATTGGTCGGTCATTGGGCA
XFM      TTACCACAAGTGGGAAGCGATGAGCGATCTCACTAATCTGCATTGGTCGGTCATTGGACA
XFP      TTACCACAAGTGGGAAGCGATGAGCGATCTCACTGATCTACCTGGTCGGTCATTGGGCA
          ***** ** * *****

XFF      CCTGCAAAACCAATAAAGCCAAGCTAGTTGCACGTTTGCCTCGGAATTCAGGCACTCGA
XFM      CCTGCAAAACCAATAAAGCCAAGCTAGTTGCACGTTTGCCTCGGAATTCAGGCACTCGA
XFP      CCTGCAAAACCAATAAAGCCAAGCTAGTTGCACGTTTGCCTCGGAATTCAGGCACTCGA
          *****

XFF      TAGTTTTCGTGTGTCAGAAGCATTGGAGCGACGTCTTCAGATAGAGGGACGTAGCCTCGA
XFM      TAGTTTTCGTGTGTCAGAAGCATTGGAGCGACGTCTTCAGATAGAGGGACGTAGCCTCGA
XFP      TAGTTTTCGTGTGTCAGAAGCATTGGAACGACGTCTTCAGATAGAGGGACGTAGCCTTGA
          *****

XFF      CGTGTGATTCAAGTCAATACCTCTGGCGAAACAAACAATACGGATTACCTCCCGAAGA
XFM      CGTGTGATTCAAGTCAATACCTCCGGTGAACAAACAATACGGATTACCTCCCGAAGA
XFP      CGTGTGATTCAAGTCAATACCTCCGGTGAACAAACAATACGGATTACCTCCCGAAGA
          ***** **

XFF      AGTTGTCCGTTTCGTACAGGCACTCTCCGCATATCCAGCGCTTCGGGTACGCGTTTGAT
XFM      AGTTGTCCGTTTCGTACAGGCACTCTCCGCATATCCAGCGCTTCGGGTACGCGTTTGAT
XFP      AGTTGTCCGTTTCGTACAGGCACTCTCCGCATATCCAGCGCTTCGGGTACGCGTTTGAT
          *****

XFF      GACGTTGGCAATGCTCTCTGGTGACACCTCGCGGGTGCGGCAATGCTTTACACAGCTGCG
XFM      GACGTTGGCGTGCTCTCTGGTGACACCTCGCGGGTGCGGCAATGCTTTACACAGCTGCG
XFP      GACGTTGGCGTGCTCTCTGGTGACGCGCTCGCGGGTGCGGCAATGCTTTACGCGAGCTGCG
          *****

XFF      CATCCTACGAGATCGCATCCAACAAGCATCACCCAGGGCCACCACATAACCGAGCTATC
XFM      CATCCTACGAGATCGCATCCAACAAGCATCACCCAGGGCCACCACATAACCGAGCTATC
XFP      CATCCTACGAGATCGCATCCAACAAGCATCACCCAGGGCCACCACATAACCGAGCTGTC
          *****

XFF      CATGGGCATGTGAGGAGATTGGAAATAGCTATAGAAGAAGGGGCGACGGTGGTACGTGT
XFM      CATGGGCATGTGAGGAGATTGGAAATAGCTATAGAAGAAGGGGCGACGGTGGTACGTGT
XFP      CATGGGCATGTGAGGAGATTGGAAATAGCTATAGAAGAAGGGGCGACGGTGGTACGTGT
          *****

XFF      AGGACAGGCAATCTACGGTGCACGTGCCCTACCCAACCTCCACTTTCACCATACTGTTTA
XFM      AGGACAGGCAATCTACGGTGCACGTGCCCTACCCAACCTCCACTTGACCATCTGTGTTTA
XFP      AGGACAGGCAATCTACGGTGCACGTGCCCTACCCAACCTCCACTTTCACCATACTGTTTA
          *****

XFF      AGCGCCGCGATTAACTCCTCTCTGAAACTGGTGTGGTTATAGCAGCGCTTTGAGTCGGT
XFM      AGCGCCGCGATTAACTCCTCTCTGAAACTGGTGTGGTTATAGCAGCGCTTTGAGTCGGT
XFP      AGCGCCGCGATTAACTCCTCTCTGAAACTGGTGTGGTTATAGCAGCGCTTTGAGTCGGT
          *****

XFF      AGAGCG
XFM      AAAGCG
XFP      AAAGCG
          * ****
```
